# Supplementary material for: Single-step grown boron doped nanocrystalline diamond-carbon nanograss hybrid as an efficient supercapacitor electrode
Source: Royal Society of Chemistry journal article supplement (doi:10.1039/d0nr00230e), 2020-01-01
Supplement: d0nr00230e1.pdf [file d0nr00230e1.pdf]

## Supporting Information

### **Single-step grown boron doped nanocrystalline diamond-carbon nanograss hybrid as an efficient supercapacitor electrode**

Debosmita Banerjee<sup>a</sup>, Kamatchi Jothiramalingam Sankaran<sup>b,c</sup>, Sujit Deshmukh<sup>a</sup>, Mateusz Ficek<sup>d</sup>, Chien-Jui Yeh<sup>e</sup>, Jacek Ryl<sup>f</sup>, I-Nan Lin<sup>e</sup>, Robert Bogdanowicz<sup>d</sup>, Alope Kanjilal<sup>a</sup>, Ken Haenen<sup>b,c</sup>, Susanta Sinha Roy<sup>a\*</sup>

<sup>a</sup>*Department of Physics, School of Natural Sciences, Shiv Nadar University, NH-91, Gautam Buddha Nagar, Uttar Pradesh 201314, India.*

<sup>b</sup>*Institute for Materials Research (IMO), Hasselt University, 3590 Diepenbeek, Belgium.*

<sup>c</sup>*IMOMECA, IMEC vzw, 3590 Diepenbeek, Belgium.*

<sup>d</sup>*Department of Metrology and Optoelectronics, Faculty of Electronics, Telecommunications and Informatics, Gdansk University of Technology, 11/12 G. Narutowicza St., 80-233 Gdansk, Poland.*

<sup>e</sup>*Department of Physics, Tamkang University, Tamsui, 251 Taiwan, Republic of China.*

<sup>f</sup>*Department of Electrochemistry, Corrosion and Materials Engineering, Faculty of Chemistry, Gdansk University of Technology, Narutowicza 11/12, 80-233 Gdansk, Poland.*

**Table S1** Parameters obtained from Lorentzian fitting of Raman spectrum.

| Peaks | Centre (cm <sup>-1</sup> ) | FWHM (cm <sup>-1</sup> ) | Intensity |
|-------|----------------------------|--------------------------|-----------|
| D     | 1352                       | 80                       | 9983.8    |
| G     | 1582                       | 45                       | 15061.9   |
| 2D    | 2695.9                     | 72                       | 5160.1    |
| D+G   | 2942                       | 134                      | 731.0     |

**Table S2:** Circuit parameters for equivalent circuit model obtained from EIS of HCNGs in 1 M Na<sub>2</sub>SO<sub>4</sub> and 0.05 M Fe(CN)<sub>6</sub><sup>3-/4-</sup> containing 1 M Na<sub>2</sub>SO<sub>4</sub> solution.

| Electrolytes                                                          | R <sub>s</sub> | R <sub>CT1</sub> | Q <sub>1</sub>            | Q <sub>2</sub>            | R <sub>CT2</sub> | Q <sub>3</sub>            | χ <sup>2</sup> |
|-----------------------------------------------------------------------|----------------|------------------|---------------------------|---------------------------|------------------|---------------------------|----------------|
| Na <sub>2</sub> SO <sub>4</sub>                                       | 69 Ω           | 100 Ω            | 45.9<br>μMho<br>α = 0.998 | 3.67<br>μMho<br>α = 0.39  | 2 kΩ             | 278<br>μMho<br>α = 0.79   | 0.01           |
| Na <sub>2</sub> SO <sub>4</sub> +Fe(CN) <sub>6</sub> <sup>3-/4-</sup> | 10 Ω           | 27.9 Ω           | 24.5<br>μMho<br>α = 0.99  | 44.1<br>μMho<br>α = 0.616 | 50 Ω             | 29.9<br>μMho<br>α = 0.623 | 0.006          |

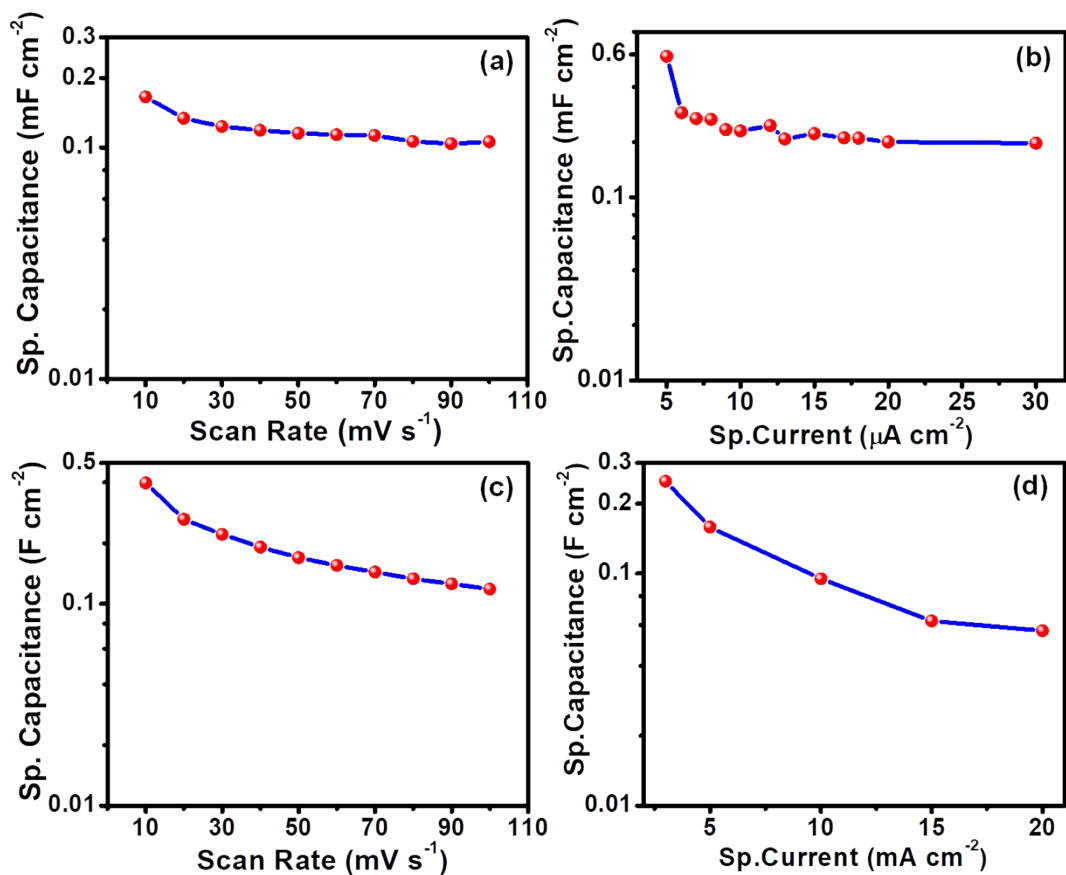

**Figure S1.** Variation of specific capacitance for HCNGs in 1M Na<sub>2</sub>SO<sub>4</sub> (a) at different scan rates and (b) at different current densities. Variation of specific capacitance for HCNGs in redox species content 1 M Na<sub>2</sub>SO<sub>4</sub> (c) at different scan rates and (d) at different current densities.

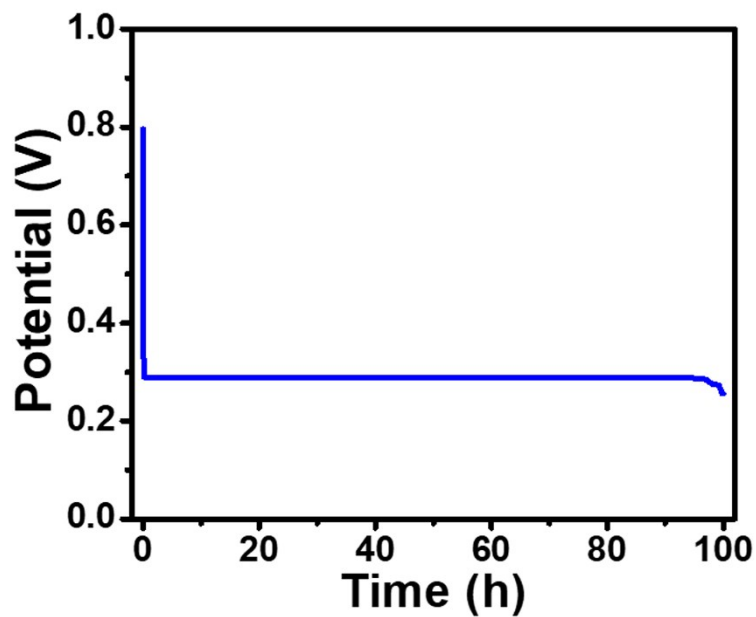

**Figure S2.** Self-discharge performance of HCNG electrode in redox species contained 1 M  $\text{Na}_2\text{SO}_4$  for 100 hours.

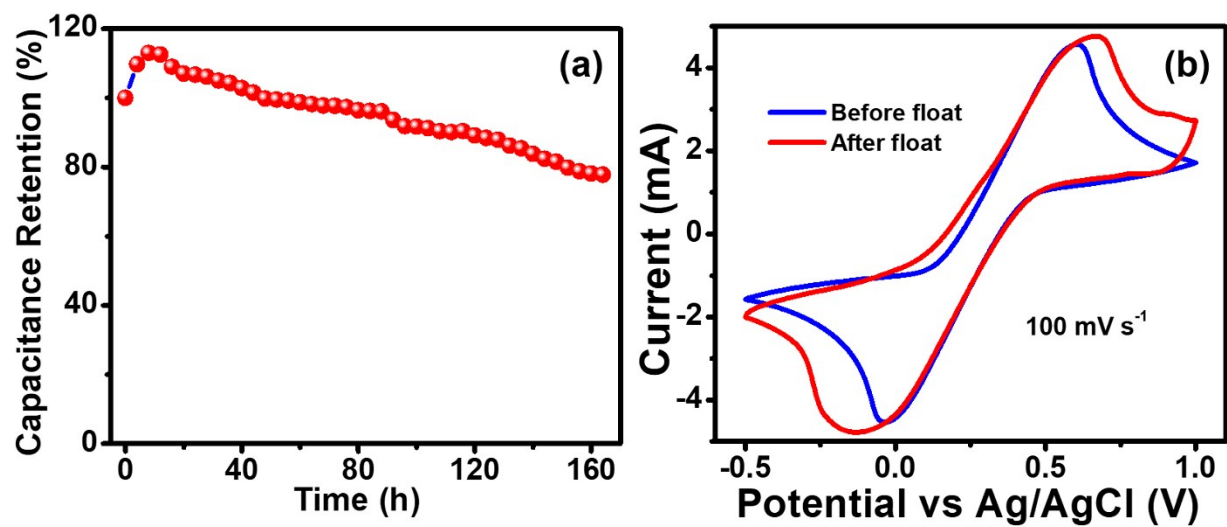

**Figure S3.** (a) Variation of capacitance retention of HCNG electrode during floating test carried out for 164 hours in 0.05 M  $\text{Fe}(\text{CN})_6^{3-/4-}$  contained 1 M  $\text{Na}_2\text{SO}_4$  aqueous solution. (b) CV

response of the HCNG electrode before and after the floating test at  $100 \text{ mV s}^{-1}$  scan rate in redox active electrolyte.
